# Supplementary material
Source: publisher figshare collection journal article supplement (https://acs.figshare.com/ndownloader/files/10844345)
Supplement: Supplementary file 1 [file 10844345]

# Abrupt Switching of Crystal Fields during Formation of Molecular Contacts

Jinjie Chen,<sup>\*,†</sup> Hironari Isshiki,<sup>†,‡</sup> Clemens Baretzky,<sup>†</sup> Timofey Balashov,<sup>†</sup> and  
Wulf Wulfhekel<sup>†</sup>

*Physikalisches Institut, Karlsruhe Institute of Technology (KIT), Wolfgang-Gaede-Straße 1,  
76131 Karlsruhe, Germany*

E-mail: jinjie.chen@kit.edu

## Supporting Information

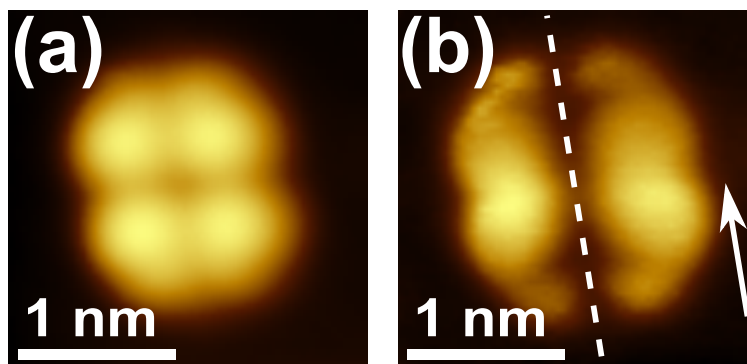

Figure S1: Topography of a Co(thd)<sub>2</sub> molecule (a) presents a four-fold symmetry, while the corresponding map of  $dI/dV$  signal on same molecule (b) shows a  $C_{1v}$  symmetry with a mirror plane (white dashed line). The white arrow indicates the [110] direction of Cu(100) surface. Set point: 720 mV, 400 pA, modulation of lock-in: 10 mV.

---

<sup>\*</sup>To whom correspondence should be addressed

<sup>†</sup>Physikalisches Institut, Karlsruhe Institute of Technology (KIT), Wolfgang-Gaede-Straße 1, 76131 Karlsruhe, Germany

<sup>‡</sup>Current address: ISSP, Wakashiba 226-1, Kashiwa-shi, Chiba-ken, 277-8581, Japan

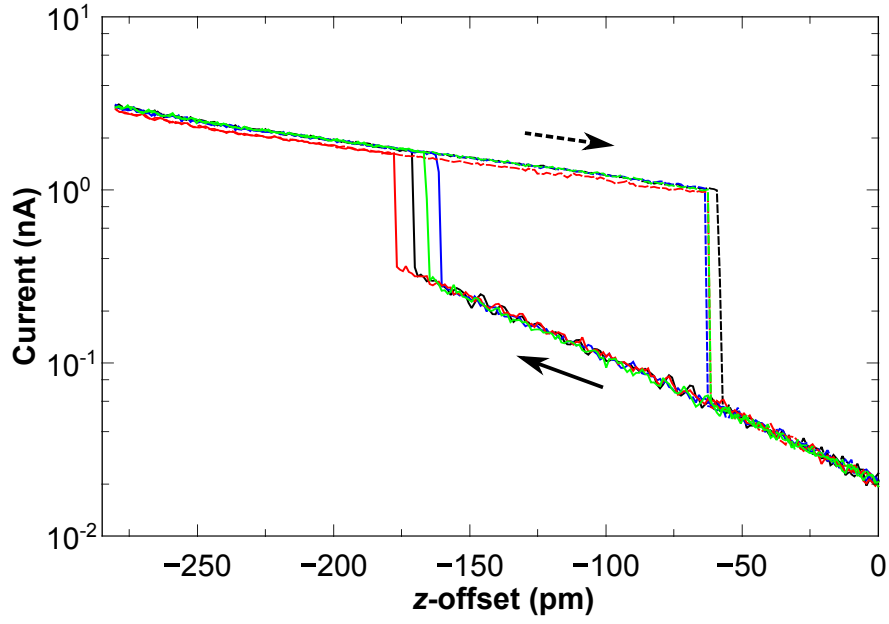

Figure S2: Four  $I(z)$  curves scanned on the center of the very same  $\text{Co}(\text{thd})_2$  molecule repeatedly. Negative  $z$ -offsets represent a decrease of the tip-sample distance from the initial set point: 20 mV, 20 pA. The arrows indicate the directions, approaching and retracting the tip. The current is on a logarithmic scale.

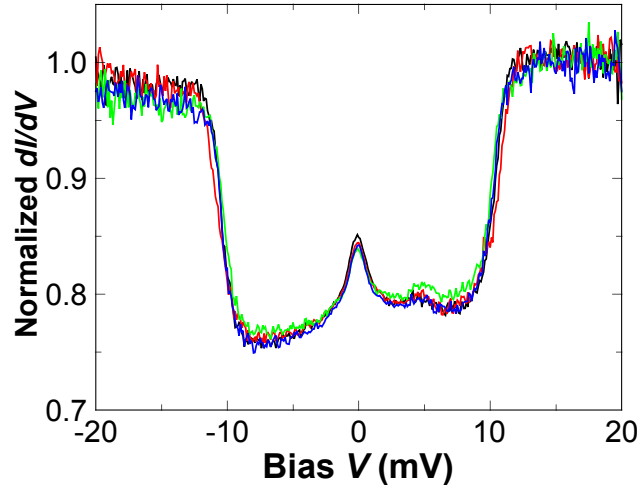

Figure S3: Four reproducible  $dI/dV$  spectra scanned respectively after each time when the tip contacted the center of a  $\text{Co}(\text{thd})_2$  molecule with a same  $z$ -offset of  $-240$  pm from the same initial set point ( $U=20$  mV,  $I=20$  pA).

Kondo resonances and inelastic spin excitations were only clearly observed when contacting the molecule in the center at the location of the metal ion. Figure S4 shows an example of  $dI/dV$  curves obtained when contacting the molecules in the center and on a ligand.

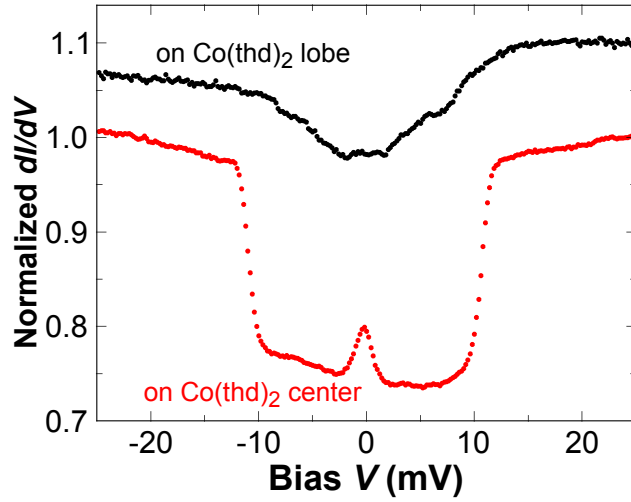

Figure S4: A comparison of normalized  $dI/dV$  spectra scanned when contacting the ligand (black) and the center (red) of a  $\text{Co}(\text{thd})_2$  molecule with a same set point ( $U=25$  mV,  $I=1$  nA). The spectrum on the ligand is vertically offset by 0.1 for clarity.

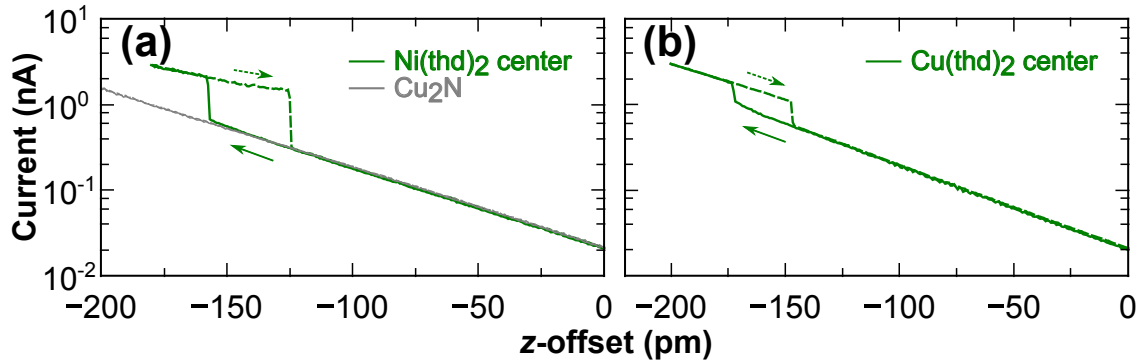

Figure S5:  $I(z)$  curves on  $\text{Ni}(\text{thd})_2$  (a) and  $\text{Cu}(\text{thd})_2$  (b) molecules. Negative  $z$ -offsets represent a decrease of the tip-sample distance from the initial set point: 20 mV, 20 pA. The arrows indicate the directions, approaching and retracting the tip. Note that the current is on a logarithmic scale.

Table S1: Determined coefficients of Kondo resonance fits near zero bias on  $dI/dV$  spectra of  $\text{Co}^{2+}$  in both tunneling and contact conditions in Fig. 1(c) with Fano function:

$y(x) = R_0(q + \frac{x - E_K}{k_B T_K})^2 / (1 + (\frac{x - E_K}{k_B T_K})^2) + kx + y_0$ , where  $T_K$ ,  $q$  and  $E_K$  are the Kondo temperature, Fano parameter and position of Kondo resonance, respectively,  $kx + y_0$  is a linear background. Note that the value of  $q$  indicates the ratio of transmission amplitudes between resonant tunneling via the Kondo state and non-resonant tunneling to the substrate, the sign of  $q$  depends on the phase shift between the two channels, which determines the resonances appearing as peaks or dips.

|            | tunneling            | contact              |
|------------|----------------------|----------------------|
| $T_K$ (K)  | $1.2 \pm 0.5$        | $11.4 \pm 0.2$       |
| $q$        | $-0.6 \pm 0.2$       | $0.07 \pm 0.02$      |
| $E_K$ (mV) | $-0.08 \pm 0.03$     | $-0.01 \pm 0.03$     |
| $R_0$      | $-0.021 \pm 0.006$   | $-0.0725 \pm 0.0007$ |
| $k$        | $-0.0025 \pm 0.0008$ | $0.0019 \pm 0.0004$  |
| $y_0$      | $1.174 \pm 0.006$    | $0.8438 \pm 0.0006$  |

Table S2: Eigenstates and eigenenergies to spin Hamiltonians quantitated by fitting the spectra.

|                           |           | eigenstate                                                       | eigenenergy (mV) |
|---------------------------|-----------|------------------------------------------------------------------|------------------|
| $\text{Co}(\text{thd})_2$ | tunneling | $0.4601  1/2\rangle + 0.0004  -1/2\rangle - 0.8879  -3/2\rangle$ | -6.36            |
|                           |           | $0.8879  3/2\rangle + 0.0004  1/2\rangle - 0.4601  -1/2\rangle$  | -6.36            |
|                           |           | $0.8879  1/2\rangle + 0.0008  -1/2\rangle + 0.4601  -3/2\rangle$ | 1.03             |
|                           |           | $-0.4601  3/2\rangle + 0.0008  1/2\rangle - 0.8879  -1/2\rangle$ | 1.03             |
|                           | contact   | $0.3147  1/2\rangle - 0.6847  -1/2\rangle - 0.6573  -3/2\rangle$ | -5.29            |
|                           |           | $-0.6573  3/2\rangle + 0.6847  1/2\rangle + 0.3147  -1/2\rangle$ | -5.29            |
|                           |           | $0.2745  1/2\rangle - 0.5973  -1/2\rangle + 0.7536  -3/2\rangle$ | 7.46             |
|                           |           | $0.7536  3/2\rangle + 0.5973  1/2\rangle + 0.2745  -1/2\rangle$  | 7.46             |
| $\text{Ni}(\text{thd})_2$ | tunneling | $-0.0106  1\rangle - 0.9998  0\rangle + 0.0106  -1\rangle$       | -0.0003          |
|                           |           | $0.7070  1\rangle - 0.0150  0\rangle - 0.7070  -1\rangle$        | 1.40             |
|                           |           | $0.7071  1\rangle + 0.7071  -1\rangle$                           | 3.51             |
|                           | contact   | $-0.5956  1\rangle + 0.5389  0\rangle + 0.5956  -1\rangle$       | -0.57            |
|                           |           | $0.3811  1\rangle + 0.8424  0\rangle - 0.3811  -1\rangle$        | 0.23             |
|                           |           | $0.7071  1\rangle + 0.7071  -1\rangle$                           | 4.19             |
